# Supplementary material
Source: publisher site journal article supplement (https://www.dovepress.com/article/246598)
Supplement: Supplementary file 1 [file get_supplementary_file.php]

| **Section & Topic** | **No**  Supplementary Table S1. Standards for Reporting Diagnostic accuracy studies (STARD) | **Item** | **Reported on page #** |
| --- | --- | --- | --- |
|  |  |  |  |
| **TITLE OR ABSTRACT** |  | **Validation of Cipto Triage Method: A Single Center Study from Indonesia.** |  |
|  | **1** | Identification as a study of diagnostic accuracy using at least one measure of accuracy  (such as sensitivity, specificity, predictive values, or AUC) | 2 (abstract introduction and results) |
| **ABSTRACT** |  |  |  |
|  | **2** | Structured summary of study design, methods, results, and conclusions  (for specific guidance, see STARD for Abstracts) | 2 |
| **INTRODUCTION** |  |  |  |
|  | **3** | Scientific and clinical background, including the intended use and clinical role of the index test | 4 |
|  | **4** | Study objectives and hypotheses | 5 |
| **METHODS** |  |  |  |
| *Study design* | **5** | Whether data collection was planned before the index test and reference standard  were performed (prospective study) or after (retrospective study) | 5 |
| *Participants* | **6** | Eligibility criteria | 6 |
|  | **7** | On what basis potentially eligible participants were identified  (such as symptoms, results from previous tests, inclusion in registry) | 6 |
|  | **8** | Where and when potentially eligible participants were identified (setting, location and dates) | 5 |
|  | **9** | Whether participants formed a consecutive, random or convenience series | 6 |
| *Test methods* | **10a** | Index test, in sufficient detail to allow replication | 6 |
|  | **10b** | Reference standard, in sufficient detail to allow replication | 6 |
|  | **11** | Rationale for choosing the reference standard (if alternatives exist) | - |
|  | **12a** | Definition of and rationale for test positivity cut-offs or result categories  of the index test, distinguishing pre-specified from exploratory | 6-7 |
|  | **12b** | Definition of and rationale for test positivity cut-offs or result categories  of the reference standard, distinguishing pre-specified from exploratory | 6-7 |
|  | **13a** | Whether clinical information and reference standard results were available  to the performers/readers of the index test | 6 |
|  | **13b** | Whether clinical information and index test results were available  to the assessors of the reference standard | 6 |
| *Analysis* | **14** | Methods for estimating or comparing measures of diagnostic accuracy | 7 |
|  | **15** | How indeterminate index test or reference standard results were handled | - |
|  | **16** | How missing data on the index test and reference standard were handled | - |
|  | **17** | Any analyses of variability in diagnostic accuracy, distinguishing pre-specified from exploratory |  |
|  | **18** | Intended sample size and how it was determined | 6 |
| **RESULTS** |  |  |  |
| *Participants* | **19** | Flow of participants, using a diagram | Supplementary files |
|  | **20** | Baseline demographic and clinical characteristics of participants | 8 |
|  | **21a** | Distribution of severity of disease in those with the target condition | 8 |
|  | **21b** | Distribution of alternative diagnoses in those without the target condition | - |
|  | **22** | Time interval and any clinical interventions between index test and reference standard | - |
| *Test results* | **23** | Cross tabulation of the index test results (or their distribution)  by the results of the reference standard | 8 |
|  | **24** | Estimates of diagnostic accuracy and their precision (such as 95% confidence intervals) | 8 |
|  | **25** | Any adverse events from performing the index test or the reference standard | 7 |
| **DISCUSSION** |  |  |  |
|  | **26** | Study limitations, including sources of potential bias, statistical uncertainty, and generalisability | 11 |
|  | **27** | Implications for practice, including the intended use and clinical role of the index test | 12 |
| **OTHER INFORMATION** |  |  |  |
|  | **28** | Registration number and name of registry | - |
|  | **29** | Where the full study protocol can be accessed | - |
|  | **30** | Sources of funding and other support; role of funders | Conflict of interest disclosure forms |

|  |  |  |  |
| --- | --- | --- | --- |

Supplementary Table S2. Table 2x2 From Each Triage Category For the Measurement of Diagnostic Performance

| Triage Officer Decision: resuscitation | Panel Judgement | | Total |
| --- | --- | --- | --- |
| Yes | No |
| Yes | 199 | 2 | 201 |
| No | 36 | 1111 | 1147 |
| total | 235 | 1113 | 1348 |

1a. Diagnostic Performance of Resuscitation Category

1b. Diagnostic Performance of Urgent Category

| Triage Officer Decision: Urgent | Panel Judgement | | Total |
| --- | --- | --- | --- |
| Yes | No |
| Yes | 716 | 144 | 860 |
| No | 17 | 471 | 488 |
| total | 733 | 615 | 1348 |

1c. Diagnostic Performance of Non-urgent Category

| Triage Officer Decision: non-urgent | Panel Judgement | | Total |
| --- | --- | --- | --- |
| Yes | No |
| Yes | 270 | 17 | 287 |
| No | 110 | 951 | 968 |
| total | 380 | 968 | 1348 |

Supplementary Figure S1. Sample of syndromic chart 1

**Basic information**

Male, 72 years old

**Syndromic Interpretation**

Severe respiratory distress due to suspected pneumonia in the elderly

**Triage decision: Resuscitation**

**Additional Symptoms**

Cough

Fever

Purulent sputum

**Main symptom**

Shortness of breath worsening gradually since 5 days

**Comorbid/mechanism of injury/congenital condition**

Type 2 Diabetes Mellitus

**Vital signs**

Response to verbal

Rapid and weak pulse 120 times/minute

Cool and calm extremities

Respiratory rates 36 times/minute

Temperature 38oC

Supplementary Figure S2. Sample of syndromic chart 2

**Basic information**

Female, 25 years old

**Syndromic Interpretation**

Mild to moderate acute exacerbation of asthma

**Triage decision: Urgent**

**Comorbid**

Asthma

**Additional Symptoms**

Cough

Wheezing

sneezing

**Main symptom**

Sudden shortness of breath

for 2 days

**Vital signs**

Alert

Rapid and strong pulse 100 times/minute

Warm extremities

Respiratory rate 24 times/minutes

Temperature 37oC

Supplementary Figure S3. Flow diagram of medical records selection for validation study of CTM

Exclude

(n= 188)

-Incomplete forms

-Left without being examined

Resuscitation

(n = 201)

Urgent

(n = 860)

Non-urgent

(n=287)

Confirm eligibility

(n = 1348)

Medical records approach for screening

(n = 1536)

Caption: CTM: Cipto triage method
